# Supplementary material
Source: PubMed Central journal article supplement (PMC5030821)

**A**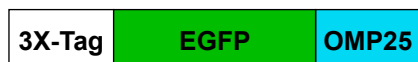**B**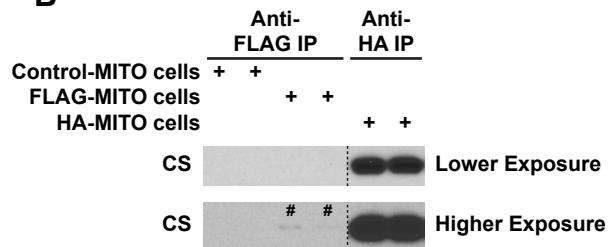**C**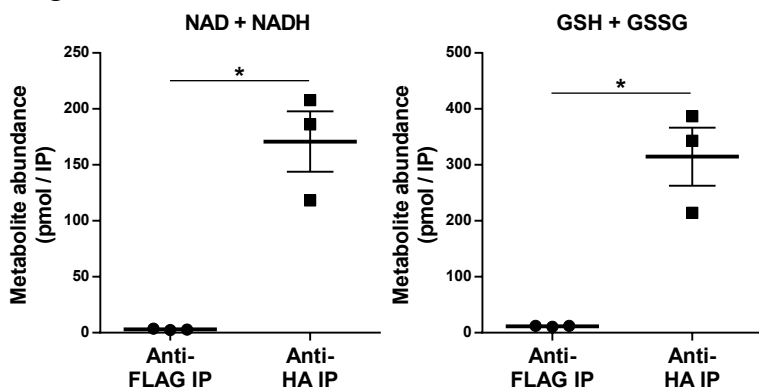**D**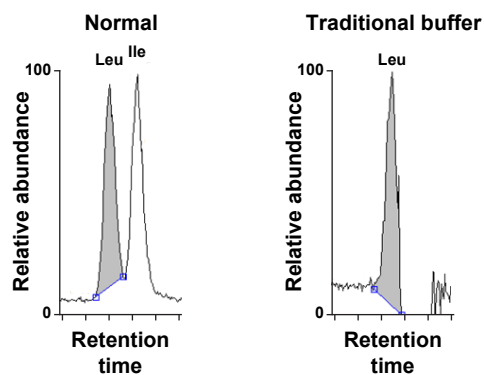**E**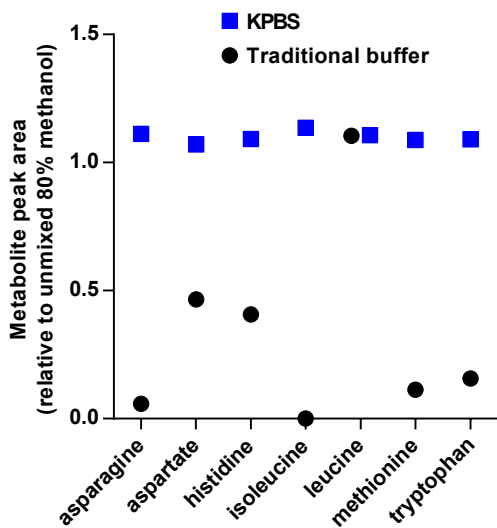**F**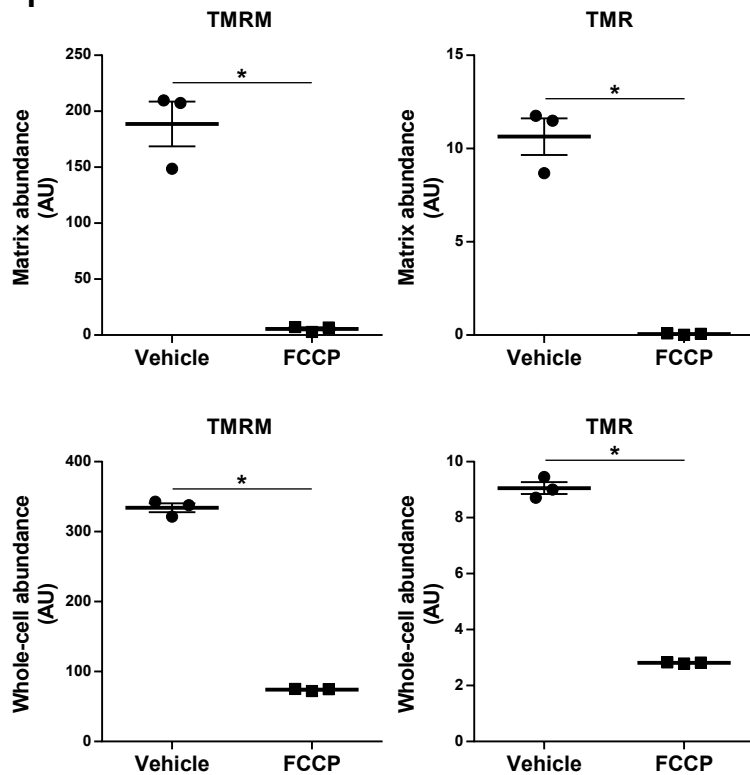

Supplement: NIHMS810319-supplement-1.pdf [file NIHMS810319-supplement-1.pdf]

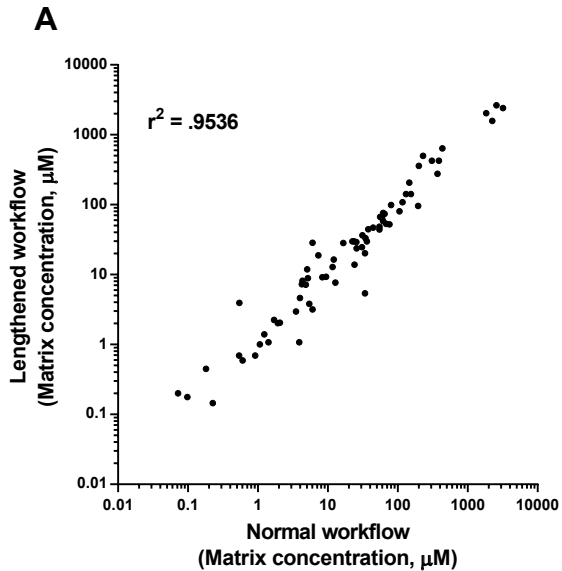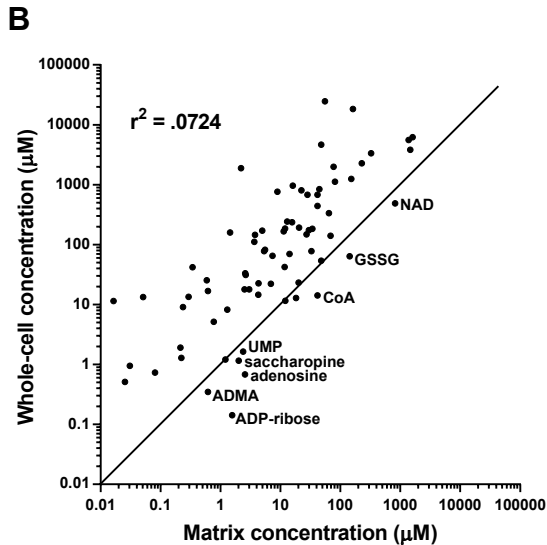

Supplement: NIHMS810319-supplement-2.pdf [file NIHMS810319-supplement-2.pdf]

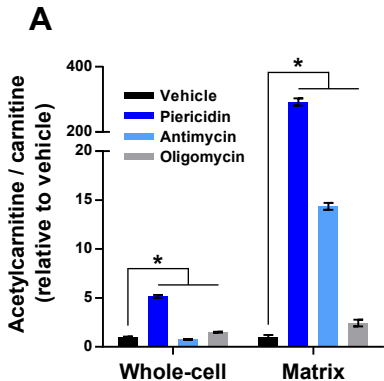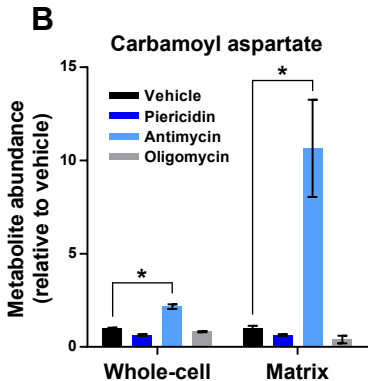

Supplement: NIHMS810319-supplement-3.pdf [file NIHMS810319-supplement-3.pdf]

## Whole-cell

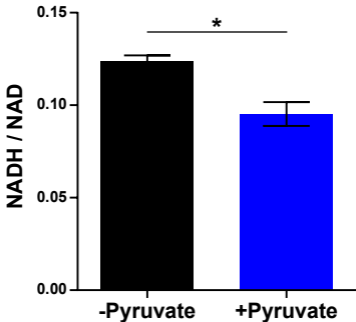

Supplement: NIHMS810319-supplement-4.pdf [file NIHMS810319-supplement-4.pdf]
